# Supplementary material
Source: ML conference proceedings conference paper supplement (https://www.ecva.net/papers/eccv_2020/papers_ECCV/html/123650664_ECCV_2020_paper.php)
Supplement: Supplementary file 3 [file 123650664-supp.zip]

Archive with 5 entries (4 files):
- eccv2020_ID3588_supplymental.pdf
- __MACOSX/
- __MACOSX/._eccv2020_ID3588_supplymental.pdf
- ECCV_ID3588_VideoMe.mp4
- __MACOSX/._ECCV_ID3588_VideoMe.mp4
